# Supplementary material for: Mitochondrial pyruvate carrier-mediated metabolism is dispensable for the classical activation of macrophages
Source: Research Square preprint supplement (doi:10.21203/rs.3.rs-1413776/v1), 2022-03-10
Supplement: Supplementary file 1 [file 67561f65732d2424d7b5ce56.docx]

| **Gene** | **Primer Sequence 5’- 3’** |
| --- | --- |
| *TNF-α* | **F:** TCTTCTCATTCCTGCTTGTGG |
| **R:** GGTCTGGGCCATAGAACTGA |
| *IL-6* | **F:** CCAGAAACCGCTATGAAGTTC |
| **R:** CGGACTTGTGAAGTAGGGAAGG |
| *IL-12b* | **F:** GGAAGCACGGCAGCAGAATA |
| **R:** AACTTGAGGGAGAAGTAGGAATGG |
| *HIF1-α* | **F:** TGCTCATCAGTTGCCACTTC |
| **R:** TGGGCCATTTCTGTGTGTAA |
| *GAPDH* | **F:** AACAGCAACTCCCACTCTTC |
| **R:** CCTGTTGCTGTAGCCGTATT |
| *HK2* | **F:** GCTGGAGGTTAAGAGAAGGATG |
| **R:** TGGAGTGGCACACACATAAG |
| *Pfkfb3* | **F:** CACCCTTCCTGTCCTTTGTT |
| **R:** CGGCATCTTCGTAGCTGTATT |

**Supplementary Table 1**
